# Supplementary material for: Social big data management through collaborative mobile, regional, and cloud computing
Source: PeerJ Comput Sci. 2025 Mar 31;11:e2689. doi: 10.7717/peerj-cs.2689 (PMC12190470; doi:10.7717/peerj-cs.2689)
Supplement: Supplemental Information 1 [file peerj-cs-11-2689-s001.xlsx]

## Sheet: Cloud Delay
	User Location	DC Location	Over Head	Sim Time (Hr)	Dcp	Dproc	Dtotal
	North America	Australia	100 KB	1	195	0.11	195.11
	North America	Australia	101 KB	2	197	0.11	197.11
	North America	Australia	102 KB	3	187	0.09	187.09
	North America	Australia	103 KB	4	204	0.09	204.09
	North America	Australia	104 KB	5	204	0.09	204.09
	North America	Australia	105 KB	6	206	0.11	206.11
	North America	Australia	106 KB	7	204	0.11	204.11
	North America	Australia	107 KB	8	205	0.11	205.11
	North America	Australia	108 KB	9	205	0.11	205.11
	North America	Australia	109 KB	10	203	0.11	203.11

## Sheet: RC Delay
	User Location	DC Location	Over Head	Sim Time (hour)	Dcp	Dproc	Dtotal
	North America	Australia	100 KB	1	689	0.1	689.1
	North America	Australia	101 KB	2	693	0.1	693.1
	North America	Australia	102 KB	3	699	0.1	699.1
	North America	Australia	103 KB	4	709	0.1	709.1
	North America	Australia	104 KB	5	712	0.1	712.1
	North America	Australia	105 KB	6	709	0.1	709.1
	North America	Australia	106 KB	7	710	0.1	710.1
	North America	Australia	107 KB	8	711	0.1	711.1
	North America	Australia	108 KB	9	711	0.1	711.1
	North America	Australia	109 KB	10	707	0.1	707.1

## Sheet: Summary 
		Cloud Servers Delay and Cost
		User Location	Socil Media Cloud Location	Over Head	CC Delay	Response Time	CC Transfer Cost
	1	North America	North America	100 KB	50		0.065
	2	South America	North America	101 KB	200		0.192
	3	Australia	North America	105 KB	200		0.228
	4	Europe	North America	102 KB	200		0.192
	5	Asia	North America	103 KB	499		0.196
	6	Africa	North America	104 KB	499		0.196
		Regional Servers Delay and Cost
		User Location	Regional Cloud Server	Over Head	RC Delay	Response Time	RC Transfer Cost
	1	North America	North America	100 KB	50		0.065
	2	South America	South America	101 KB	50		0.065
	3	Australia	Australia	105 KB	49		0.065
	4	Europe	Europe	102 KB	50		0.065
	5	Asia	Asia	103 KB	50		0.065
	6	Africa	Africa	104 KB	50		0.065
		Mobile Edge Computing Servers Delay and Cost
		User Location	Regional Cloud Server	Over Head	MC Delay	Response Time	MC Transfer Cost
	1	North America	North America		12		0.02
	2	South America	South America		12		0.02
	3	Australia	Australia		12		0.02
	4	Europe	Europe		12		0.02
	5	Asia	Asia		12		0.02
	6	Africa	Africa		12		0.02
